# Supplementary material
Source: PubMed Central journal article supplement (PMC4024925)
Supplement: 1318906111_pnas.1318906111.sapp.pdf [file 1318906111_pnas.1318906111.sapp.pdf]

## Materials and Methods

**Mice:** 9-11 week-old C57BL/6 male mice were housed four per cage, maintained on a 12hr light/dark schedule, and allowed free access to food and water. All testing was conducted during the light phase in red-light-illuminated testing rooms following protocols approved by the Animal Ethics Committee of the University of Queensland.

**DNA/RNA Extraction:** ILPFC tissue from naïve and trained mice was prepared by dounce homogenization in 500µl PBS. 400µl of homogenate was used for DNA extraction, and 100µl was used for RNA extraction. Preparation of DNA was carried out using the DNeasy Blood & Tissue Kit (Qiagen), and RNA was extracted using Trizol reagent (Invitrogen). Both extraction protocols were followed according to the manufacturer's instructions.

**qRT-PCR:** Total 500ng RNA was used for cDNA synthesis using the Quantitect Reverse Transcription Kit (Qiagen). Quantitative PCR was performed on a RotorGeneQ (Qiagen) real-time PCR cycler with SYBR-Green Master mix (Qiagen), using primers for target genes and for PGK as an internal control (supplementary table 1). The threshold cycle for each sample was chosen from the linear range and converted to a starting quantity by interpolation from a standard curve run on the same plate for each set of primers. All mRNA levels were normalized for each well relative to PGK using the  $\Delta\Delta$ CT method, and each PCR reaction was run in duplicate for each sample and repeated at least twice.

**5-hmC and 5-mC capture:** Genomic DNA was sheared (Covaris) with an average size of 300bp prior to capture. 5hmC/5-mC enrichment was performed using an hMeDIP kit (Active Motif) for enrichment of 5-hmC, or a MeDIP kit (Active Motif) for 5-mC. The procedures were followed according to manufacturer's instructions.

**High-throughput DNA sequencing on 5-hmC-enriched samples:** Sequencing libraries were generated for each of 8 mice in each group by the Illumina TrueSeq Prep kit (Illumina) as per the manufacturer's protocol without the final PCR amplification step. Briefly, 100ng of DNA was used for library preparation and a normalized pooling step was performed on indexed genomic DNA from each individual animal prior to 5-hmC capture. Following this step, final PCR amplification using the Illumina TrueSeq Prep Kit. and PCR-amplified DNA libraries were quantified on an Agilent 2100 Bioanalyzer. Cluster densities were created and each library, at a final concentration of 8pM, was used for subsequent cluster generation using the version 3 flow cell. The Illumina HiSeq2000 was then used for paired-end (100bp) sequencing. Image processing and sequence extraction were achieved using the standard Illumina Genome Analyzer software and pipelines developed in-house at the Queensland Brain Institute, The University of Queensland.

CASAVA software (v1.8.2) was used to demultiplex the samples and generate raw reads for each sample in fastq format.

**Bioinformatics:** Alignment of short reads to reference genome: Paired-end reads were aligned to the mouse reference genome (mm9) using BWA (v0.6.2). Samtools (v0.1.17) and Picard (v1.72) software packages were then used to convert aligned “.sam” files to “.bam” files, sort the “.bam” and remove duplicates. Reads with low mapping quality (<20) were excluded from the downstream analysis. Normalized depth of coverage for plotting peaks: Based on the outcomes from “Align short reads to reference” (quality filtered bam files), for each position (at single base pair resolution) of the peak and nearby region, we counted the number of DNA fragment that can cover this position. “DNA fragment” here means the one in the sequencing library, with both ends being sequenced in the paired-end sequencing strategy (For example, read1 is aligned to chr1:201-301, and read2 is aligned to chr1:310-410, then the DNA fragment of this read-pair would be chr1:201-410). The number of DNA fragments in each sample was normalized to 10 million total DNA fragments (equal to 20 million total reads) and normalized to the corresponding “input” sample. The mean normalized values of 8 biological replicates from each condition were used to plot the depth of coverage. A custom PERL script that integrates Samtools and R codes was applied to do this work mentioned above. Peak calling: MACS (v1.4.2) was used to call peaks for each sample using a parameter setting “-f BAM --keep-dup=all -g mm --nomodel --shiftsize 100” and applying two criteria for *P*-value cutoff: “1e-2” and “1e-5”. Peaks identified in all samples with *P*-value cutoff “1e-2” were then integrated based on pairwise comparison using custom PERL scripts with the following criteria: if the distance between two peak summits is equal or less than 300 bp, then these two peaks were considered as a common peak and grouped together. For each peak group, we counted the number of biological replicates in each condition, and this number represents the intensity of each peak in each condition illustrated in Figure 1a. In total, we have four conditions: namely CXT, FC, FC-No EXT and EXT, with 8 biological replicates in each condition, so in theory the maximal number of samples in all 4 conditions to support a peak will be 4×8=32. In Figure 1a, we only plotted peaks with the supported number larger than 4 in all conditions to eliminate most of the noises, and ensure that we wouldn't miss any potential interesting peaks that only exist in one condition (e.g. 0 in CXT, FC and FC-No EXT conditions, while 5 in EXT condition). Functional annotation clustering: Peaks supported by at least 5 of 8 biological replicates in extinction training group but not in other groups were considered as 5-hmC peaks induced by extinction training. In total, 143 5-hmC peaks were parsed. Genes located within 50 kb distance from these peaks were considered, and there are 233 genes included. These genes were then applied for functional annotation clustering using DAVID 6.7 web-based functional annotation tool suites. Analysis of dinucleotide combinations in peak regions: Both core regions and summit regions of peaks identified in each biological replicate were picked up to calculate the proportions of “CA”, “CC”, “CG” and “CT” dinucleotide combinations using custom PERL scripts. Here, the core region is defined as 100bp extension from each peak summit in both 5' and 3' directions. The summit region is defined as the interval that was covered by

the highest number of fragments in a peak region. Analysis of peak locations: All peaks identified in eight biological replicates were included to analyze their genomic locations according to the gene coordinates defined in the GTF file for *Mus musculus* (mm9) from Illumina iGenomes database (<http://cufflinks.cbcb.umd.edu/igenomes.html>). Six categories including promoter, 5' UTR, 3' UTR, CDS, intron and intergenic regions were considered. Promoter region was defined as 2000 bp upstream from the first exon of each transcript. If peaks locate in several different categories, we put in the order of priority: Promoter, 5'-UTR, 3'-UTR, CDS, Intron and Intergenic regions.

**Tet3/Tet1 knockdown lentiviral constructs:** Lentiviral plasmids were generated by inserting either Tet1 or Tet3 shRNA using the following sequences: shRNA-Tet1: GCAGATGGCCGTGACACAAAT; shRNA-Tet3: GCCTGTTAGGCAGATTGTTCT (the Tet3 shRNA sequence was provided by Dr. Yi Zhang, Harvard) immediately downstream of the human H1 promoter in a modified FG12 vector (FG12H1, derived from the FG12 vector originally provided by David Baltimore, CalTech). Lentivirus was prepared and maintained according to previously published protocols<sup>20</sup>.

**Lentiviral surgery:** Double cannulae (PlasticsOne) were implanted in the anterior posterior plane, along the midline, into the infralimbic prefrontal cortex (ILPFC), a minimum of 3 days prior to viral infusion. The injection locations were centered at +1.78 mm in the anterior-posterior plane (AP), and -2.5 mm in the dorsal-ventral plane (DV). A total volume of 4.0µl of lentivirus was introduced via 2 injections delivered within 48 hours. For both knockdown experiments, mice were first fear conditioned, followed by 2 lentiviral infusions 24 hours post-fear conditioning, and, after a one-week of incubation, the mice were extinction trained.

**Behavioral Tests:** Two contexts (A and B) were used for all behavioral fear testing. Both conditioning chambers (Coulbourn Instruments) had two transparent walls and two stainless steel walls with a steel grid floors (3.2 mm in diameter, 8 mm centers); however, the grid floors in context B were covered by flat white plastic transparent surface to minimize context generalization. Individual digital cameras were mounted in the ceiling of each chamber and connected via a quad processor for automated scoring of freezing measurement program (FreezeFrame). Fear conditioning was performed in context A with spray of lemon-alcohol (5% lemon and 10% alcohol). Then, actual fear condition protocol was starting with 120 sec pre-fear conditioning incubation; then, followed by three pairing of a 120 sec, 80dB, white noise conditioned stimulus (CS) co-terminating with a 1 sec (2 min intervals), 0.7 mA foot shock (US). Mice were matched into equivalent treatment groups based on freezing during the third training CS. For extinction, mice were exposed in context B with a stimulus light on and spray of vinegar. Mice allowed to be acclimated for 2 min, and then, extinction training comprised 30 non-reinforced 120 sec CS presentations (5-sec intervals). For the behavior control experiments, context exposure was performed for both fear condition and fear extinction training. Animal, inside 3CS-US or 30CS treatment, only exposed into either context A or B with

equal times of mice spend there by fear condition or extinguished mice but were not exposed to any 3CS-US or 30 CS. For the retention test, all mice were returned to context B and following a 2 min acclimation (used to minimize context generalization), freezing was assessed during two 120sec CS presentations (120 sec intertribal interval). Memory was calculated as the percentage of time spent freezing during the tests.

**Behavioral Training (for tissue collection):** Naïve animals remained in their home cage until sacrifice. For the other groups, fear conditioning consisted of three pairing (120sec inter-trial interval ITI) of a 120sec, 80dB, white noise conditioned stimulus (CS) Co-terminating with a 2s, 0.7mA foot shock in context A. Mice were matched into equivalent treatment groups based on freezing during the third training CS. Context A exposure group spent an equivalent amount of time in context A without any CS and US. Tissue for Fear conditioned mice and context A exposure group was collected 26hr after the context A training session. One day later, the fear-conditioned mice were brought to context B, where the extinction group (EXT) was presented with 30CS presentations (5s ITI). The fear-conditioned without extinction (FC No-EXT) group spent an equivalent amount of time in context B without any CS presentations. Tissue was collected from both of these groups 2hr and 24hr after the end of their context B session.

**Immunohistochemistry:** Mice were euthanized with 100mg/Kg ketamine, after which 50ml of 1:100000 sodium nitrite, in PBS, was pumped through the circulatory system serving as a vasodilator. To fix the tissue, 4% paraformaldehyde in PBS was used. Following extraction, the brains were stored in 0.05% sodium azide. The brains were placed in 30% sucrose for a minimum 24hr prior to cryostat slicing. Sectioning at 14um was performed using Zeiss Microm HM560 cryostat, and sections were mounted on Menzel-Glaser Superfrost Plus microscope slides. Briefly, the sections were incubated 1-2hr in blocking buffer, after which primary antibodies (Tet3, GFP or NeuN) were added and the slides incubated at 4°C overnight. The slides were then washed 3 times with PBS containing 0.02% Tween 20 (PBS-T), after which secondary antibodies were added (Dylight 488-conjugated AffiniPure sheep anti-mouse IgG or Dylight 549-conjugated AffiniPure goat anti-rabbit IgG, Jackson ImmunoResearch Laboratories). The slides were then incubated at room temperature for 2hr, washed 3 times with PBS or PBST, and cover-slipped.

**Chromatin immunoprecipitation:** Chromatin immunoprecipitation (ChIP) was performed following modification of the Invitrogen ChIP kit protocol. Tissue was fixed in 1% formaldehyde and cross-linked cell lysates were sheared by Covaris in 1% SDS lysis buffer to generate chromatin fragments with an average length of 300bp. The chromatin was then immunoprecipitated using the specific antibody to each targets (list of antibodies in supplementary Table 2) or equivalent amount of control normal rabbit IgG (Santa Cruz) overnight at 4°C. Protein-DNA-antibody complexes were precipitated with protein G-magnetic beads for 1hr at 4°C, followed by three washes in low salt buffer, and three washes in high salt buffer. The precipitated protein-DNA complexes were eluted from the antibody with 1% SDS and 0.1M NaHCO<sub>3</sub>, then incubated

overnight at 65°C in 200mM NaCl to reverse formaldehyde cross-link. Following proteinase K digestion, phenol-chloroform extraction, and ethanol precipitation, samples were subjected to qPCR using primers specific for 200bp segments corresponding to the target regions.

**Primary cortical neuron and N2a cell culture:** Cortical tissue was isolated from E18 mouse embryos in a sterile atmosphere. To dissociate the tissue it was finely chopped followed by digestion in 0.125% Trypsin (GIBCO 25200) for 12 mins. To prevent clumping of cells due to DNA from dead cells, tissue was treated with 2 unit/ $\mu$ l of DNase I. Cells finally went through the 40 $\mu$ m cell strainer (BD Falcon 352340) and were plated onto 6 well plate coated with Poly-L- Ornithine (Sigma P2533) and Fibronectin (GIBCO 33016-015) at a density of  $1 \times 10^6$  cells per well. The medium used was Neurobasal medium (GIBCO 21103) containing 5% serum, B27 supplement (GIBCO 17504-044) and 0.5-1% Pen/Strep (GIBCO 15140). N2a cell was maintained in medium contains half DMEM, high glucose (GIBCO 11965-092), half OptiMEM 1 (Gibco 26140-079) with 5% serum and 1% Pen/Strep. KCl treatment: final concentration of 25mM of KCl was used for KCl stimulation on primary cortical neurons.

**5-hmC Dot blot:** Primary cortical neurons were cultured for 2weeks prior to lentiviral treatment. 5 $\mu$ l of wither Fg12hH1 or Tet3 shRNA lentivirus added into cell culture. After a 7-day incubation, KCl treatment was applied to the infected neurons. 7hr after, genomic DNA was collected from cell culture. Then, genomic DNA were denatured with 0.1 N NaOH and spotted on nitrocellulose blotting membranes (PALL Life Sciences). The membrane was baked at 80 °C and then blocked in 5% skimmed milk in TBS containing 0.1% Tween 20 (TBST) for 1 h at room temperature. The membranes were then incubated with 1:10000 dilution of 5h-mC (Active Motif) overnight at 4 °C. After three washes with TBST, membranes were incubated with 1:2000 dilution of HRP-conjugated anti-rabbit. The membranes were then washed with TBST followed by TBS, and then treated with ECL.

**Quantification of 5-hmC:** Genomic DNA was extracted from lentiviral infected primary cortical neurons after KCl treatment. The global level of 5-hmC was assessed using a MethylFlash Hydroxymethylated DNA Quantification Kit (Epigentek). The procedure was followed according to the manufacturer's instructions.

## Supplemental Data

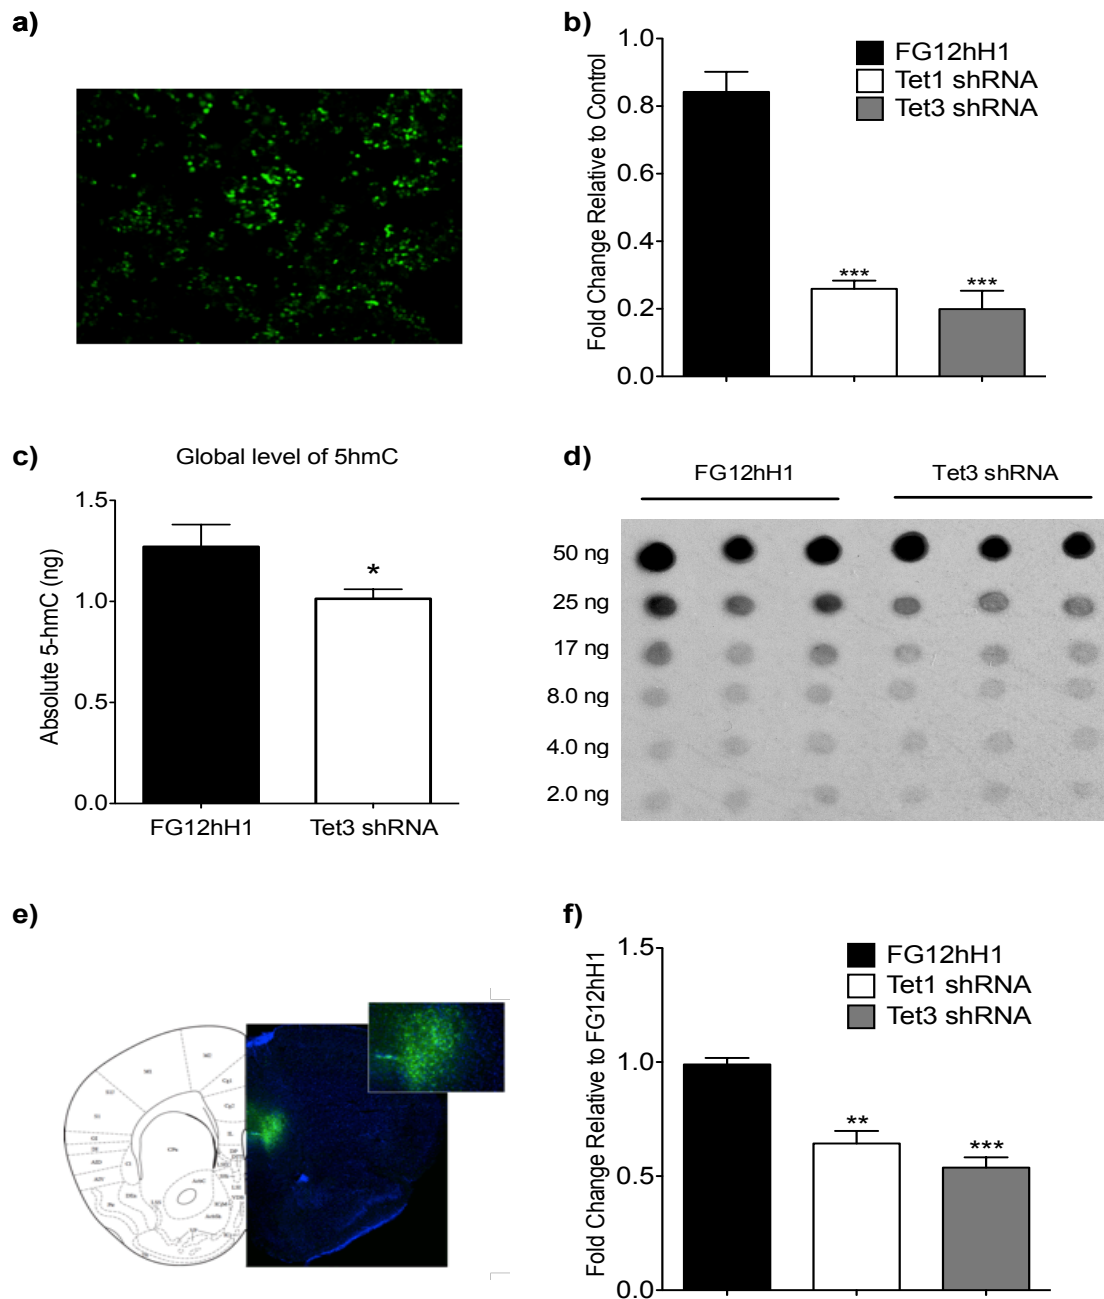

Supplemental Figure 1. Tet1 and Tet3 validation. a) Representative image of viral expression in N2A cells (6 days in vitro) after transfection with Tet1 and Tet3 shRNA. b) We achieved 70% knockdown of Tet1 mRNA after transfection of N2A cells, and 80% knockdown of Tet3 mRNA after transfection of N2A cells with either Tet1 or Tet3 shRNA, respectively (n=3 per group,  $F_{2,8} = 53.52$ ,  $P < .0001$ , Tukey's posthoc test FG12hH1 vs Tet1 shRNA,  $***p < 0.0001$ ; FG12hH1 vs Tet3 shRNA  $***p < 0.0001$ ). c) There was a 20% reduction in global 5-hmC in primary cortical neurons after Tet3 shRNA transfection. (n=3,  $t_4 = 2.155$   $p < .05$ ). d) Representative image of global decrease in 5-hmC, in primary cortical neurons, by Tet3 knockdown. e) Representative image of Tet1 and Tet3 shRNA viral expression, in vivo, after 7 days transfection. f) We achieved 40% knockdown of Tet1 mRNA and 50% knockdown of Tet3 mRNA after either Tet1 or Tet3 shRNA lentiviral transfection in vivo (n=3, per group,  $F_{2,8} = 28.80$ ,  $P < .0008$ , Tukey's post-hoc test FG12hH1 vs Tet1 shRNA,  $**p < 0.005$ ; FG12hH1 vs Tet3 shRNA  $***p < 0.0001$ ).

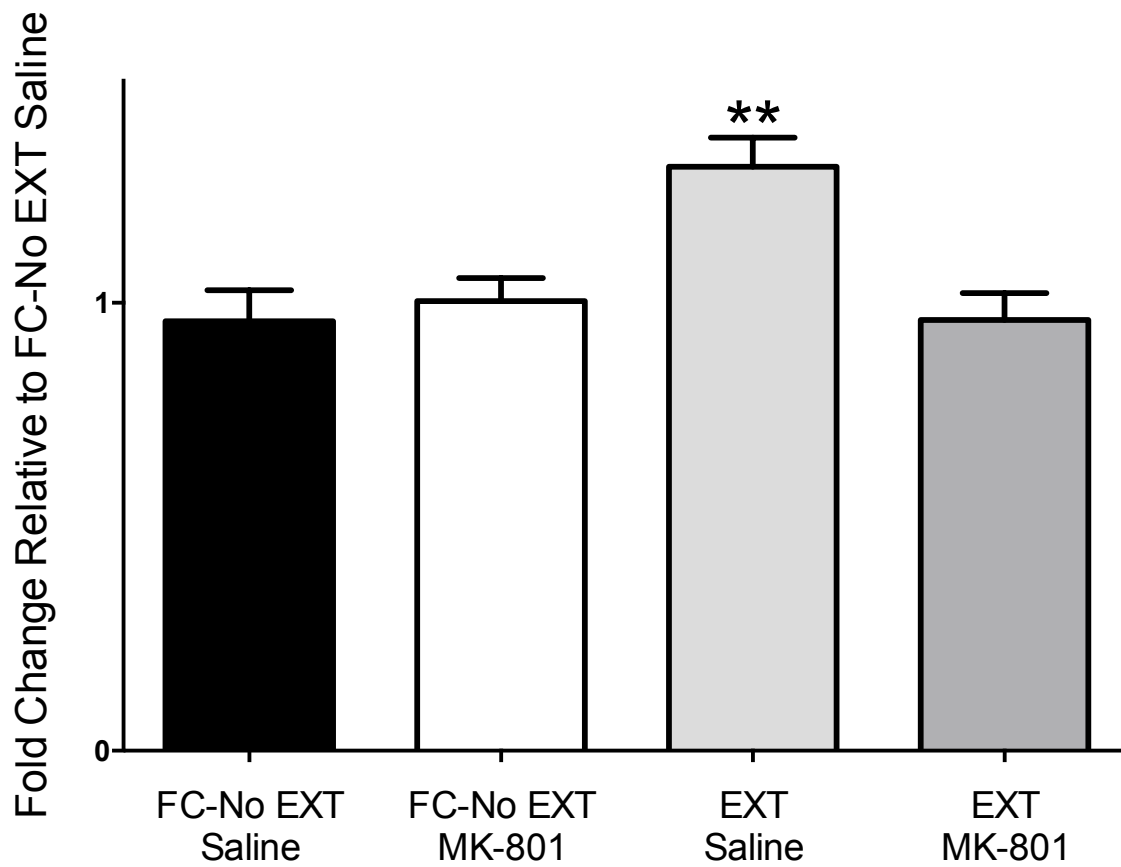

**Supplemental Figure 2.** In the presence of the NMDA antagonist MK-801, which impairs the acquisition of fear extinction memory, extinction training does not lead to increased Tet3 mRNA expression (n=4 per group,  $F_{3, 15}=7.243$ ,  $p<.005$ ; Dunnett's posthoc test FC-No EXT Saline vs. all other groups, Error bars represent S.E.M. \*\* $P<.01$ )

| Sample ID                                              | Total reads<br>(n) | Properly aligned reads<br>(n) | (%)    | Reads with high mapping-quality<br>(n) | (%)    |
|--------------------------------------------------------|--------------------|-------------------------------|--------|----------------------------------------|--------|
| Biological replicates and input for CXT samples:       |                    |                               |        |                                        |        |
| S1_M1                                                  | 82813682           | 76849866                      | 92.80% | 66661234                               | 80.50% |
| S1_M2                                                  | 112054006          | 104318108                     | 93.10% | 90976550                               | 81.19% |
| S1_M3                                                  | 59739794           | 56023256                      | 93.78% | 49547718                               | 82.94% |
| S1_M4                                                  | 54605460           | 51178904                      | 93.72% | 45163600                               | 82.71% |
| S1_M5                                                  | 48934858           | 45994296                      | 93.99% | 40684262                               | 83.14% |
| S1_M6                                                  | 63559930           | 59940010                      | 94.30% | 53261106                               | 83.80% |
| S1_M7                                                  | 66977022           | 60779026                      | 90.75% | 53414666                               | 79.75% |
| S1_M8                                                  | 114348778          | 104280004                     | 91.19% | 92573542                               | 80.96% |
| S1_input                                               | 52949598           | 49040590                      | 92.62% | 43874848                               | 82.86% |
| Biological replicates and input for FC samples:        |                    |                               |        |                                        |        |
| S2_M1                                                  | 122457440          | 114445032                     | 93.46% | 99948412                               | 81.62% |
| S2_M2                                                  | 45702306           | 43048230                      | 94.19% | 38428530                               | 84.08% |
| S2_M3                                                  | 64711214           | 61466604                      | 94.99% | 55153470                               | 85.23% |
| S2_M4                                                  | 63585774           | 60068268                      | 94.47% | 53036188                               | 83.41% |
| S2_M5                                                  | 83060502           | 78451488                      | 94.45% | 69840072                               | 84.08% |
| S2_M6                                                  | 30503326           | 28245458                      | 92.60% | 24977124                               | 81.88% |
| S2_M7                                                  | 103345940          | 93884592                      | 90.84% | 83713524                               | 81.00% |
| S2_M8                                                  | 54905478           | 50835630                      | 92.59% | 45207068                               | 82.34% |
| S2_input                                               | 57599848           | 54385364                      | 94.42% | 48429596                               | 84.08% |
| Biological replicates and input for FC-No EXT samples: |                    |                               |        |                                        |        |
| S3_M1                                                  | 100762130          | 93229072                      | 92.52% | 80232808                               | 79.63% |
| S3_M2                                                  | 97076064           | 91527160                      | 94.28% | 81443088                               | 83.90% |
| S3_M3                                                  | 42275882           | 39912288                      | 94.41% | 35273374                               | 83.44% |
| S3_M4                                                  | 41424246           | 39248234                      | 94.75% | 34851572                               | 84.13% |
| S3_M5                                                  | 58448422           | 55488390                      | 94.94% | 49565766                               | 84.80% |
| S3_M6                                                  | 59368876           | 55705588                      | 93.83% | 49861462                               | 83.99% |
| S3_M7                                                  | 66571246           | 61070398                      | 91.74% | 53965576                               | 81.06% |
| S3_M8                                                  | 76244754           | 70190044                      | 92.06% | 61900114                               | 81.19% |
| S3_input                                               | 67750382           | 63051834                      | 93.06% | 56247886                               | 83.02% |
| Biological replicates and input for EXT samples:       |                    |                               |        |                                        |        |
| S4_M1                                                  | 62836406           | 58995126                      | 93.89% | 51822052                               | 82.47% |
| S4_M2                                                  | 74263672           | 69772052                      | 93.95% | 61443168                               | 82.74% |
| S4_M3                                                  | 83581306           | 79208682                      | 94.77% | 70545828                               | 84.40% |
| S4_M4                                                  | 76287798           | 71795594                      | 94.11% | 63422870                               | 83.14% |
| S4_M5                                                  | 61068024           | 57100826                      | 93.50% | 51253448                               | 83.93% |
| S4_M6                                                  | 73549352           | 68575804                      | 93.24% | 60444720                               | 82.18% |
| S4_M7                                                  | 86609390           | 81127560                      | 93.67% | 72318390                               | 83.50% |
| S4_M8                                                  | 82921966           | 77294708                      | 93.21% | 69141852                               | 83.38% |
| S4_input                                               | 45113746           | 41243620                      | 91.42% | 36548098                               | 81.01% |

**Supplementary Table 1.** The sequencing statistics for 8 biological replicates and input DNA in each condition. Shown are the number of raw sequencing reads and the number of successfully aligned reads, with the read length of 101bp. “Properly aligned reads” represents the paired-end reads are mapped to the reference genome in a proper pair, and “reads with high mapping-quality” denotes paired-end reads are mapped in a proper pair with at least Q20 of the mapping quality.



| Categories                             | Peaks before normalisation |        | Peaks after normalisation |        |
|----------------------------------------|----------------------------|--------|---------------------------|--------|
|                                        | (n)                        | (%)    | (n)                       | (%)    |
| Peaks identified in CXT samples:       |                            |        |                           |        |
| Promoter                               | 1928                       | 0.91%  | 4140                      | 16.05% |
| 5' UTR                                 | 114                        | 0.05%  | 2021                      | 7.84%  |
| 3' UTR                                 | 627                        | 0.30%  | 2834                      | 10.99% |
| CDS                                    | 377                        | 0.18%  | 1157                      | 4.49%  |
| Intron                                 | 57812                      | 27.23% | 6513                      | 25.26% |
| Intergenic                             | 151453                     | 71.34% | 9121                      | 35.37% |
| Peaks identified in FC samples:        |                            |        |                           |        |
| Promoter                               | 1173                       | 0.86%  | 2518                      | 14.74% |
| 5' UTR                                 | 81                         | 0.06%  | 1436                      | 8.41%  |
| 3' UTR                                 | 478                        | 0.35%  | 2161                      | 12.65% |
| CDS                                    | 301                        | 0.22%  | 923                       | 5.41%  |
| Intron                                 | 37951                      | 27.95% | 4275                      | 25.03% |
| Intergenic                             | 95798                      | 70.55% | 5769                      | 33.77% |
| Peaks identified in FC-No EXT samples: |                            |        |                           |        |
| Promoter                               | 2214                       | 0.77%  | 4754                      | 13.61% |
| 5' UTR                                 | 175                        | 0.06%  | 3103                      | 8.89%  |
| 3' UTR                                 | 978                        | 0.34%  | 4421                      | 12.66% |
| CDS                                    | 463                        | 0.16%  | 1421                      | 4.07%  |
| Intron                                 | 77253                      | 26.74% | 8703                      | 24.92% |
| Intergenic                             | 207861                     | 71.94% | 12518                     | 35.85% |
| Peaks identified in EXT samples:       |                            |        |                           |        |
| Promoter                               | 1493                       | 6.53%  | 3206                      | 23.64% |
| 5' UTR                                 | 172                        | 0.75%  | 3049                      | 22.49% |
| 3' UTR                                 | 452                        | 1.98%  | 2043                      | 15.07% |
| CDS                                    | 1159                       | 5.07%  | 3557                      | 26.24% |
| Intron                                 | 9989                       | 43.72% | 1125                      | 8.30%  |
| Intergenic                             | 9584                       | 41.94% | 577                       | 4.26%  |

**Supplementary Table 2.** Shown is the absolute amount as well as the proportion of peaks in each genomic category for each condition. To observe the unbiased distribution of peaks in each genomic category, we normalised the total length of each genomic category to the length of 100 Mbp and the number of peaks was proportionally scaled in each category. Since the genomic categories is mainly based on the known gene models, only peaks within chromosome 1 ~ 19, X and Y were considered for this analysis.

|           | Total peaks<br>(n) | Peaks overlap with DNase1<br>hypersensitive regions |        |
|-----------|--------------------|-----------------------------------------------------|--------|
|           |                    | (n)                                                 | (%)    |
| CXT       | 215170             | 11810                                               | 5.49%  |
| FC        | 137116             | 6898                                                | 5.03%  |
| FC-No EXT | 292064             | 13885                                               | 4.75%  |
| EXT       | 23084              | 6278                                                | 27.20% |

**Supplementary Table 3.** Shown are total numbers of peaks overlapping with DNase1 hypersensitive regions in each condition.

| CXT                       |        |        |
|---------------------------|--------|--------|
|                           | Number | %      |
| Total peaks               | 215170 |        |
| Peaks overlap with Dnase1 | 11810  | 5.49%  |
| Individual Samples        |        |        |
| s1M1                      | 4485   | 5.00%  |
| s1M2                      | 3685   | 5.00%  |
| s1M3                      | 189    | 10.00% |
| s1M4                      | 702    | 12.00% |
| s1M5                      | 780    | 12.00% |
| s1M6                      | 193    | 11.00% |
| s1M7                      | 1462   | 4.00%  |
| s1M8                      | 314    | 4.00%  |

| FC                        |        |       |
|---------------------------|--------|-------|
|                           | Number | %     |
| Total peaks               | 137116 |       |
| Peaks overlap with Dnase1 | 6898   | 5.03% |
| Individual Samples        |        |       |
| s2M1                      | 1888   | 4.00% |
| s2M2                      | 811    | 9.00% |
| s2M3                      | 151    | 8.00% |
| s2M4                      | 208    | 7.00% |
| s2M5                      | 47     | 7.00% |
| s2M6                      | 2161   | 6.00% |
| s2M7                      | 35     | 5.00% |
| s2M8                      | 1597   | 4.00% |

| FC-No EXT                 |        |       |
|---------------------------|--------|-------|
|                           | Number | %     |
| Total peaks               | 292064 |       |
| Peaks overlap with Dnase1 | 13885  | 4.75% |
| Individual Samples        |        |       |
| s3M1                      | 4616   | 5.00% |
| s3M2                      | 2761   | 5.00% |
| s3M3                      | 873    | 8.00% |
| s3M4                      | 898    | 9.00% |
| s3M5                      | 413    | 9.00% |
| s3M6                      | 341    | 7.00% |
| s3M7                      | 2481   | 4.00% |
| s3M8                      | 1502   | 3.00% |

| EXT                       |        |        |
|---------------------------|--------|--------|
|                           | Number | %      |
| Total peaks               | 23084  |        |
| Peaks overlap with Dnase1 | 6278   | 27.20% |
| Individual Samples        |        |        |
| s4M1                      | 184    | 12.00% |
| s4M2                      | 259    | 7.00%  |
| s4M3                      | 78     | 15.00% |
| s4M4                      | 130    | 15.00% |
| s4M5                      | 4894   | 40.00% |
| s4M6                      | 409    | 20.00% |
| s4M7                      | 137    | 18.00% |
| s4M8                      | 187    | 18.00% |

**Supplemental Table 4.** Absolute number of peaks, as well as the proportion of peaks overlapping with DNase1-hypersensitive regions, in each individual sample.

| Chromosome | Coordinates           | Accession    | Gene    | Locus             | Function                                                                                                                                                                                                                     |
|------------|-----------------------|--------------|---------|-------------------|------------------------------------------------------------------------------------------------------------------------------------------------------------------------------------------------------------------------------|
| Chr 10     | 106874444 - 106875435 | NM_001033223 | Lin7a   | Distal promoter   | Ensures the proper localization of GRIN2B (subunit 2B of the NMDA receptor) to neuronal postsynaptic density and may function in localizing synaptic vesicles at synapses where it is recruited by beta-catenin and cadherin |
| Chr 12     | 79451546 - 79452206   | NM_172952    | Gphn    | Intronic region   | Anchors inhibitory neurotransmitter receptors to the postsynaptic cytoskeleton via high affinity binding to receptor subunit domain and tubulin dimers                                                                       |
| Chr 4      | 46790275 - 46791304   | NM_001081141 | Gabbr2  | Intronic region   | Inhibits neuronal activity through G protein-coupled second-messenger systems, which regulate the release of neurotransmitters, and the activity of ion channels and adenylyl cyclase                                        |
| Chr 4      | 33232743 - 33234064   | NM_008075    | Gabrr1  | Intronic region   | Variation in Gabrr1 is associated with bipolar disorder and schizophrenia                                                                                                                                                    |
| Chr 3      | 107280962 - 107282861 | NM_172271    | Slc6a17 | Intronic region   | Acts as a transporter for neurotransmitters                                                                                                                                                                                  |
| Chr 8      | 14306397 - 14307611   | NM_172910    | Dlgap2  | Intronic region   | Plays a role in the molecular organization of synapses and in neuronal cell signalling. Also, this gene is biallelically expressed in the brain                                                                              |
| Chr 1      | 157019773 - 157021196 | NM_021433    | Stx6    | Intronic region   | Involved in intracellular vesicle trafficking                                                                                                                                                                                |
| Chr 2      | 5297035 - 5298239     | NM_177343    | Camk1d  | Intronic region   | Regulates basal dendritic growth of neurons                                                                                                                                                                                  |
| Chr 16     | 94919771 - 94921197   | NM_001113389 | Dyrk1a  | Intragenic region | A strong candidate gene for learning defects associated with Down syndrome                                                                                                                                                   |
| Chr 11     | 101600970 - 101602074 | NM_144831    | Dhx8    | Intronic region   | This protein facilitates nuclear export of spliced mRNA by releasing the RNA from the spliceosome                                                                                                                            |
| Chr 17     | 90991625 - 90993660   | NM_177284    | Nrxn1   | Intronic region   | Neurexin1 is a neuronal membrane bound protein that is involved in cell recognition and cell adhesion. Also, it may play a role in the formation and maintenance of synaptic junctions                                       |
| Chr 11     | 108872621-108873849   | NM_015732    | Axin2   | Intragenic region | Plays an important role in the regulation of beta-catenin stability within the Wnt signaling pathway                                                                                                                         |
| Chr 5      | 13395512- 13396352    | NM_001243072 | Sema3a  | Proximal promoter | Stimulates the growth of apical dendrites                                                                                                                                                                                    |

**Supplemental Table 5.** Candidate gene list selected based on proximity to 5-hmC peaks occurring after extinction training.

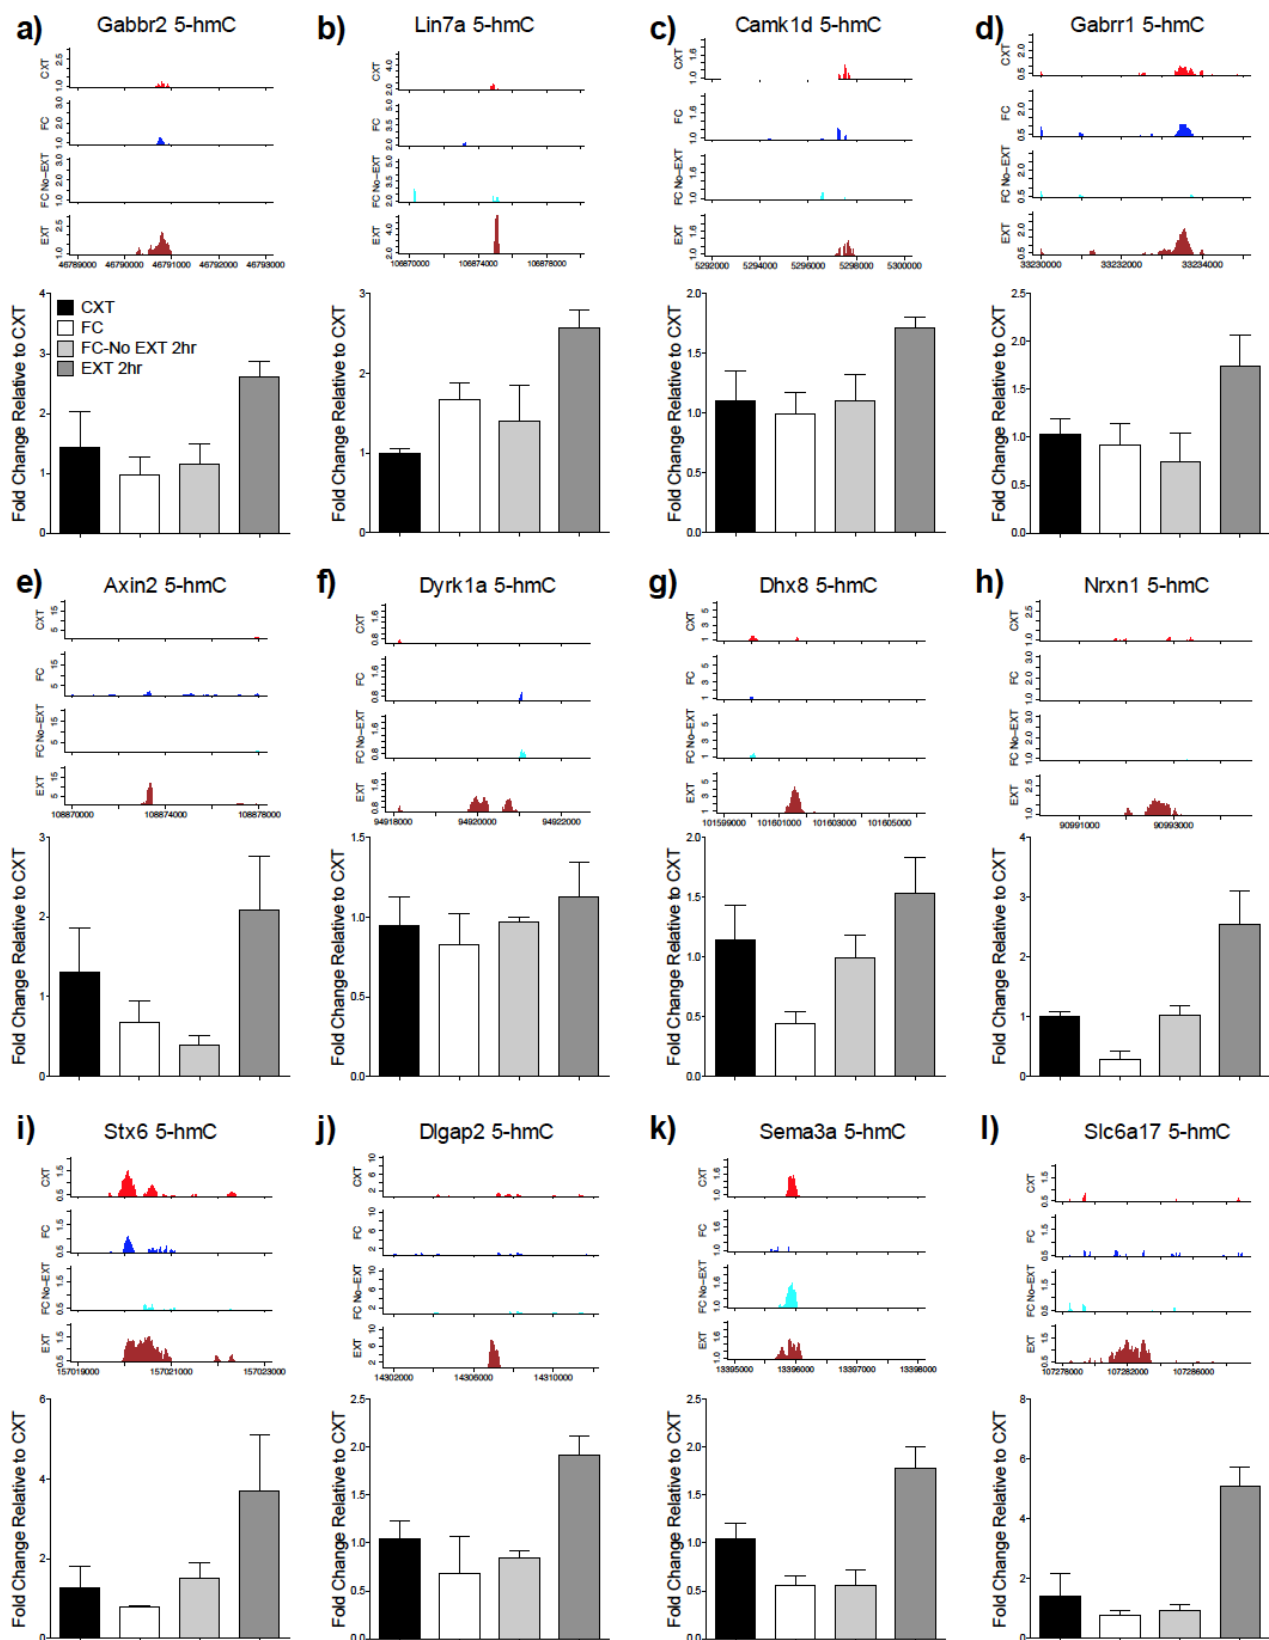

**Supplemental Figure 3.** Validation of twelve candidate genes associated with 5-hmC enrichment by hMeDIP-qPCR. For each panel, top: plots for normalized base counts from sequencing data; bottom: hMeDIP-qPCR result.

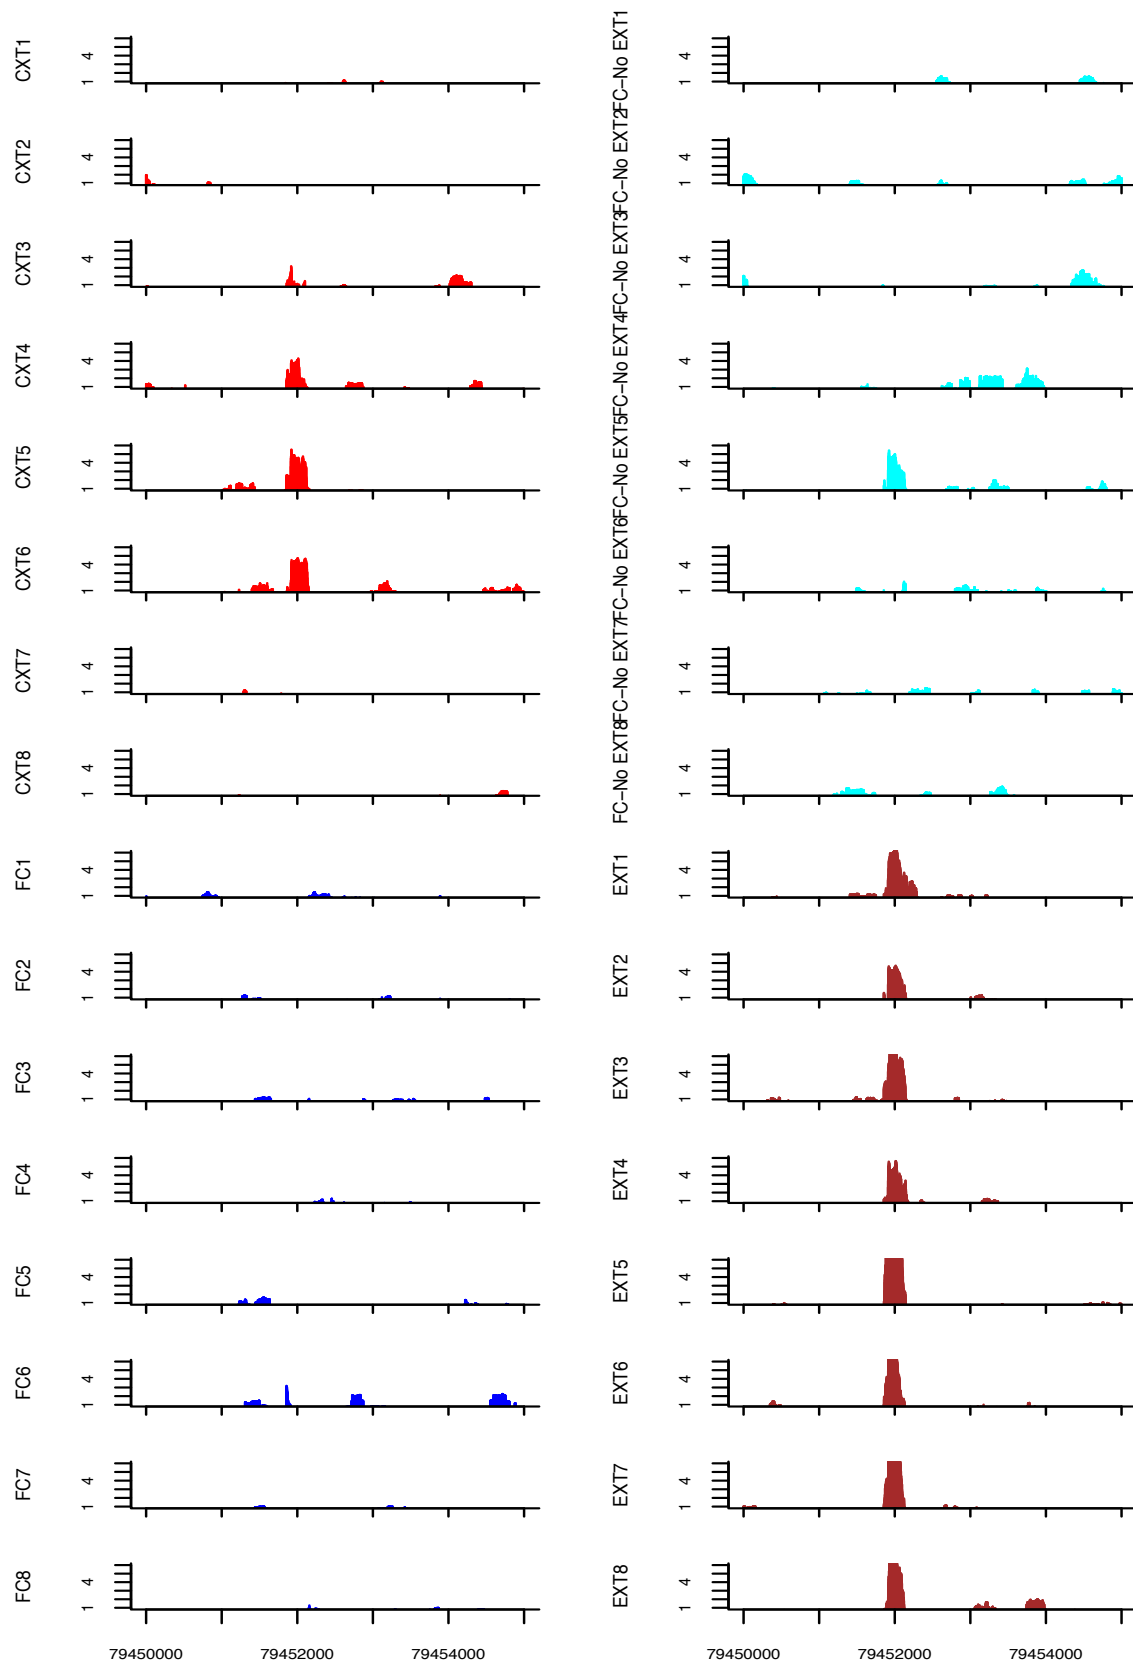

**Supplemental Figure 4.** Plots for normalized base counts of gephyrin genomic region from each individual sample.

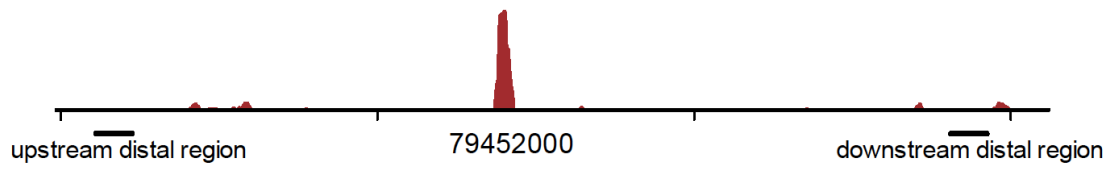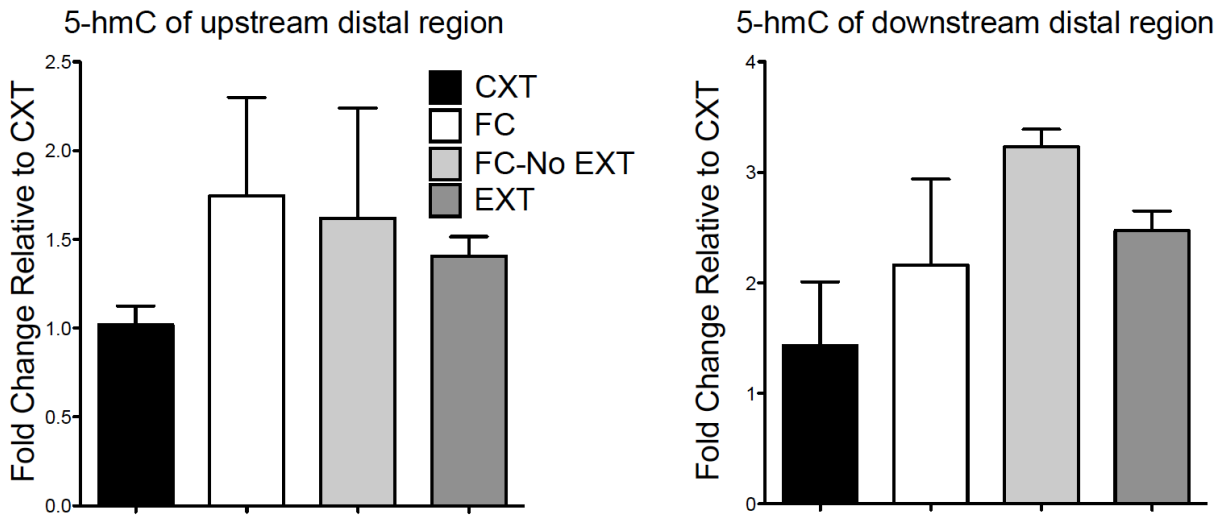

**Supplemental Figure 5.** There is no accumulation of 5-hmC within regions upstream or downstream of the gephyrin intronic locus.

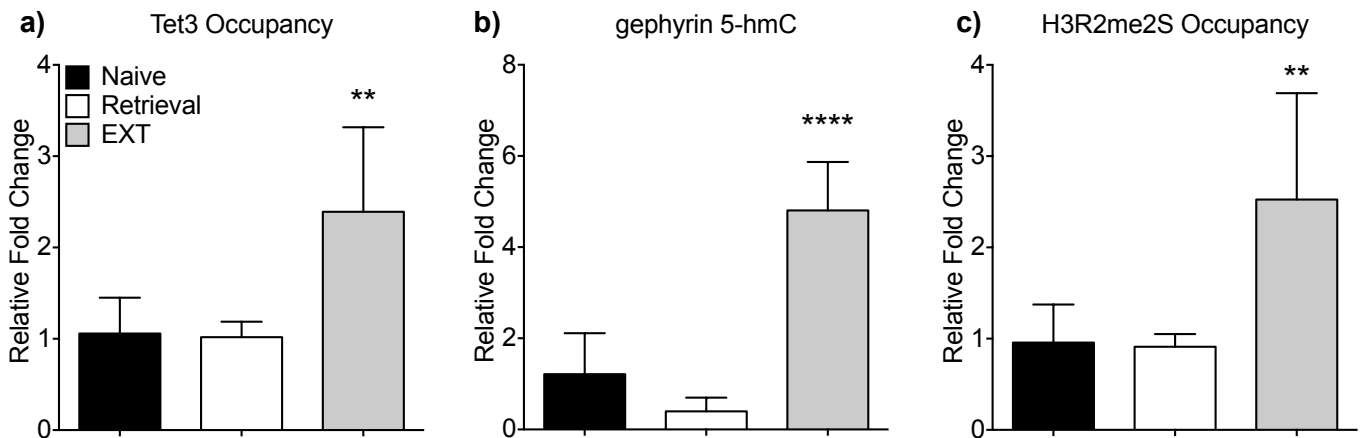

**Supplemental Figure 6. A 30 CS fear extinction training protocol induces epigenetic modifications that are distinct from a single CS evoked retrieval- or reconsolidation-induced epigenetic state.** Relative to naïve or 1 CS exposure, extinction-trained mice exhibit a significant increase in a) Tet3 occupancy at the gephrin locus ( $n=6/\text{group}$   $F_{2,15}=10.54$ ,  $p<.01$ , Tukey's post-hoc analysis naïve and retrieval vs EXT,  $**p<.01$ ), b) the accumulation of 5-hmC at the gephyrin locus ( $n=6/\text{group}$   $F_{2,15}=48.74$ ,  $p<.0001$ , Tukey's post-hoc analysis naïve and retrieval vs EXT,  $****p<.0001$ ), and c) H3R2me2S occupancy at the gephyrin locus ( $n=5-6/\text{group}$   $F_{2,13}=8.82$ ,  $p<.01$ , Tukey's post-hoc analysis naïve and retrieval vs EXT,  $**p<.01$ ).



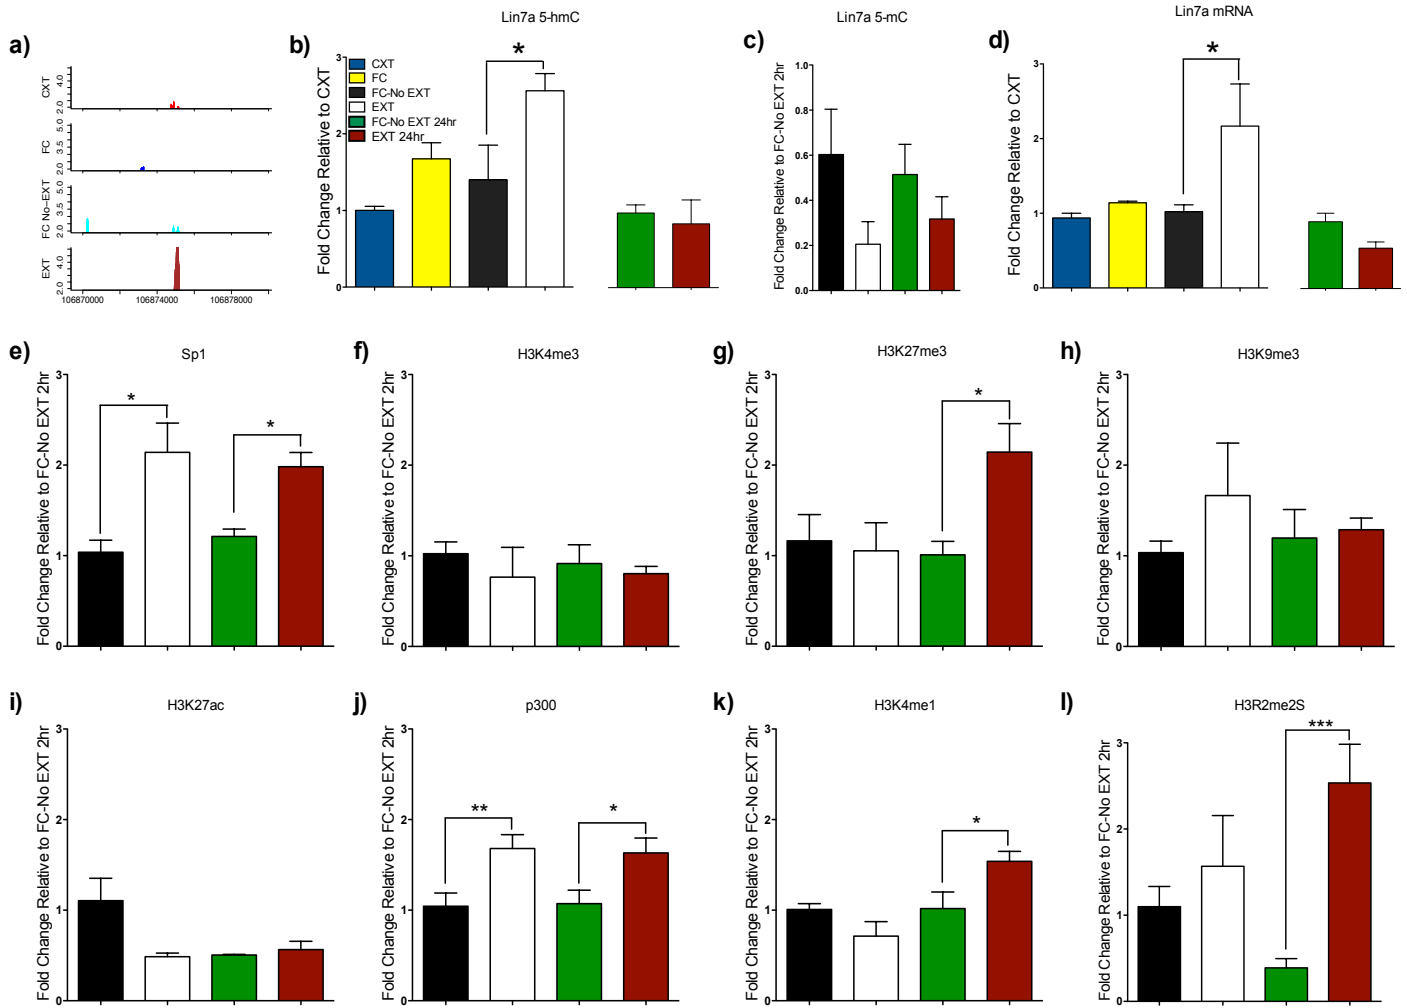

**Supplemental Figure 7. Fear extinction learning-mediated accumulation of 5-hmC within the distal promoter region of Lin7a is associated with altered chromatin environment.** a) Shown is the normalized plot of coverage for the 5-hmC peak in the distal promoter region of Lin7a. b) Significant enrichment of 5-hmC within the distal promoter region of Lin7a occurs after fear extinction training (n = 3-4 per group, 2 hrs  $F_{3,14} = 5.04$ ,  $p < .01$ ; Tukey's post-hoc analysis FC-No EXT 2hr vs EXT 2hr,  $*p < .02$ ). c) No significant change in methylation accumulation around the distal promoter region of Lin7a after training. Fear extinction led to a transient increase in gephyrin mRNA expression (d; n = 5-6 per group,  $F_{3,19} = 4.67$ ,  $p < .05$ ; Tukey's post-hoc analysis FC-No EXT 2hr vs EXT 2hr,  $*p < .05$ ), a persistent increase in the occupancy of Sp1 (e; n = 4-5 per group,  $F_{3,16} = 5.88$ ,  $p < .05$ ; Tukey's post-hoc analysis FC-No EXT 2hr vs EXT 2hr,  $*p < .05$ ; FC-No EXT 24hr vs EXT 24hr,  $*p < .05$ ), no effect on H3K4<sup>me3</sup> (f), a transient increase of H3K27<sup>me3</sup> 24hr post-extinction training (g;  $t_6 = 3.269$   $p < .05$ ), no effect on heterochromatin mark H3K9<sup>me3</sup> (h), a decrease of H3K27<sup>ac</sup> occupancy after fear condition and fear extinction training (i), a persistent increase in presence of the enhancer-related elements p300 (j; 2 hrs,  $t_8 = 3.019$   $p < .001$ ; 24 hrs,  $t_8 = 2.54$   $p < .05$ ), an increase of H3K4<sup>me1</sup> 24hrs post-extinction training (k;  $t_8 = 2.454$   $p < .05$ ), and an increase in H3R2<sup>me2S</sup> (l;  $t_4 = 4.643$   $p < .0001$ ) within the infralimbic prefrontal cortex. (Error bars represent S.E.M.)

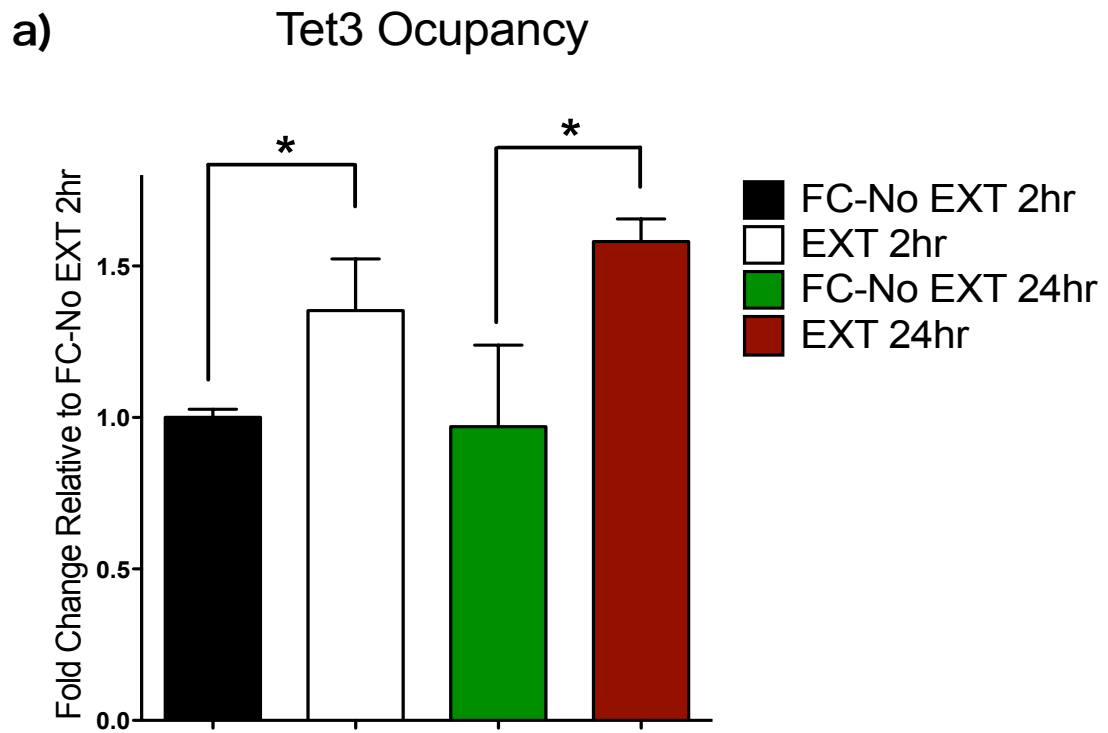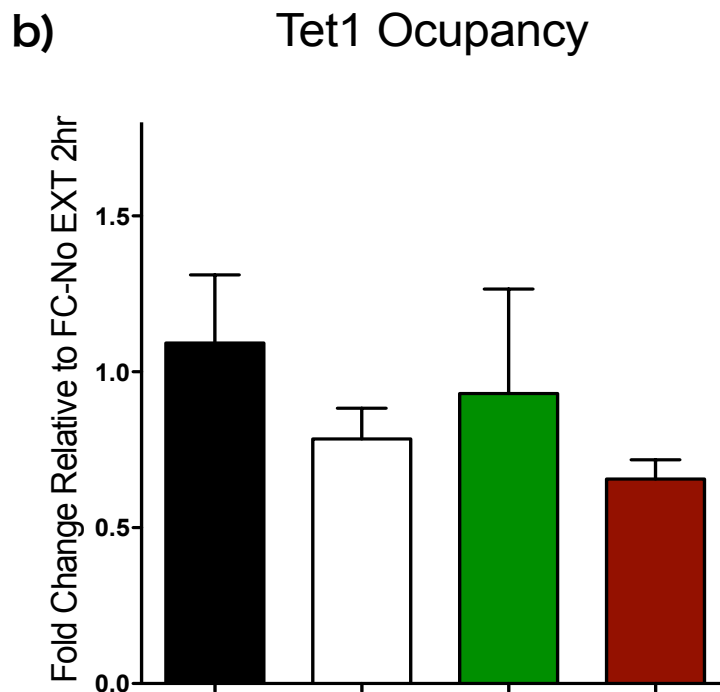

**Supplemental Figure 8. Extinction learning leads to an increase in Tet3 occupancy at the Lin7a promoter.** a) Fear extinction learning leads to a persistent increase in Tet3 occupancy in the distal promoter of Lin7a (2 hrs,  $t_6 = 2.03$   $p < .05$ ; 24 hrs,  $t_8 = 2.18$   $p < .05$ ). b) There is no significant change in Tet1 occupancy in the Lin7a distal promoter region.

## Antibodies

| Name        | Host   | cat#      | Company      |
|-------------|--------|-----------|--------------|
| H3K4Me3     | rabbit | 39915     | active motif |
| H3K27Me3    | rabbit | 39155     | active motif |
| H3K4Me1     | rabbit | 39297     | active motif |
| H3R2Me2s    | rabbit | 39703     | active motif |
| H2A.Z       | rabbit | ab4147    | Abcam        |
| Sp1         | rabbit | 07-645    | Millipore    |
| Tet1        | rabbit | 09-872    | Millipore    |
| Tet3-chIP   | rabbit | SC-139186 | Santa Cruz   |
| Tet3-Immuno | rabbit | ab139311  | Abcam        |
| NeuN        | mouse  | MAB377    | Millipore    |

## Primers

| qPCR Primer       |                          |
|-------------------|--------------------------|
| Gphn LP           | CAACCACGACCATCAAATCCG    |
| Gphn RP           | CCAACAAAGAAGGATCTTGGACA  |
| Pgk LP            | TGCACGCTTCAAAGCGCACG     |
| Pgk RP            | AAGTCCACCCTCATCACGACCC   |
| Tet1 LP           | GAGCCTGTTCTCGATGTGG      |
| Tet1 RP           | CAAACCCACCTGAGGCTGTT     |
| Tet3 LP           | TCCGGATTGAGAAGGTCATC     |
| Tet3 RP           | CCAGGCCAGGATCAAGATAA     |
| Gabbr2-hmeDIP-LP  | TCCAGGAAGGTGACTACAGTG    |
| Gabbr2-hmeDIP-RP  | GCACCCAGTCCTGGATACAT     |
| Dlgap2-hmeDIP-LP  | TGATCGTGAGAGGCAAGATG     |
| Dlgap2-hmeDIP-RP  | AATCTCCTCTCTGCCCACTG     |
| Camk1d-hmeDIP-LP  | AGTTTGGGAGAGGGGAAAAA     |
| Camk1d-hmeDIP-RP  | AGGAGTCAGCCACCAACT       |
| stx6-hmeDIP-LP    | AGGGATGTGAAGGACCCTCT     |
| stx6-hmeDIP-RP    | TTCCCAGCAGATGCAGAAC      |
| AXIN2-hmeDIP-LP   | CTGGATTTGGGGATCTGAAC     |
| AXIN2-hmeDIP-RP   | GAAC TTTGAAGGCCGAAGTG    |
| Sema3a-hmeDIP-LP  | TTTTGGAGGAGGGAGTTTGA     |
| Sema3a-hmeDIP-RP  | GGCAGATTGGTCATTGAGTG     |
| Gabbr1-hmeDIP-LP  | CTTTCCTGCCAAGCTCATTC     |
| Gabbr1-hmeDIP-RP  | CACGTCTCTGTGAGGAGCAC     |
| Lin7a-hmeDIP-LP   | ATTCGCAATGCACACACTTT     |
| Lin7a-hmeDIP-RP   | TGGACAGGACGGTGTGAATA     |
| Slc6A-hmeDIP17 LP | GGGGTATGGCTGGACTGATG     |
| Slc6A17-hmeDIP RP | CCACTGTGTCTGCATCACCT     |
| Dhx8-hmeDIP LP1   | TTTCTCTCAGGAAGCGGTGG     |
| Dhx8-hmeDIP RP1   | GCTGTGGACACAGACAGACA     |
| Nrxn1-hmeDIP LP1  | AACAAGTGAGGTTGGTGGCT     |
| Nrxn1-hmeDIP RP1  | CTCAAAC T GAAATTGACCCACA |
| Gphn-hmeDIP LP    | TAGAACACTGCCTTGTCCCC     |
| Gphn-hmeDIP RP    | TCACCATAGCAACCCGTCTT     |
| Dyrk1a-hmeDIP LP  | ATGGGAGGCACTTTGTGAGG     |
| Dyrk1a-hmeDIP RP  | CTACAGCTGATACCCAGCCAG    |
